## **Title: Cost-Benefit Analysis for Universal Cataract Coverage in India**

**Short Title:** Cataract coverage India cost-benefit

**Authors:** Anoushka Arora<sup>1,2</sup>, Madhurima Vuddemarry<sup>1,3</sup>, Chaitanya Reddy<sup>1,4</sup> Himanshu Iyer<sup>1</sup>, Pushkar Nimkar<sup>1,5</sup> Siddhesh Zadey<sup>1,6,7</sup>

### **Affiliations:**

1 Association for Socially Applicable Research, Pune, Maharashtra, India

2 Smt. Nathiba Hargovandas Lakhmichand Municipal Medical College, Ahmedabad, Gujarat, India

3 Rajarshi Chhatrapati Shahu Maharaj Government Medical College and Chhatrapati Pramilaraje Hospital, Kolhapur, Maharashtra, India

4 Smt. Bhikhiben Kanjibhai Shah Medical Institute and Research Centre, Vadodara, Gujarat, India

5 Economics and Computation, Duke University, Durham, NC US

6. GEMINI Research Center, Duke University School of Medicine, Durham North Carolina USA

7 Dr. D.Y. Patil Medical College, Hospital, and Research Centre, Pune, Maharashtra, India

### **Corresponding author:**

Siddhesh Zadey BSMS, MScGH;

ASAR Office Address: D2 Sai Heritage, New DP Road, Aund5h, Pune, M&5&aharashtra, India 411007

Email: [sidzadey@asarforindia.org](mailto:sidzadey@asarforindia.org); Ph. No.: +1-919-699-9557

**Article Type:** Full-length article

**Competing interests:** The corresponding author Siddhesh Zadey is the Cofounding Director of the Association for Socially Applicable Research (ASAR). He also serves as the Permanent Council Member, The G4 Alliance Chair, SOTA Care in South Asia Working Group The G4 Alliance, and the Drafting Committee Member for Maharashtra State Mental Health Policy. The other authors declare no conflicts of interest.

**Funding:** None

## Abstract

**Purpose:** To calculate the annual enhanced coverage costs for covering the total and unmet need of cataract in India. To calculate the economic benefits of cataract burden averted. To calculate the net benefits of covering cataract needs.

**Setting:** We look at population-level data of India and its 30 states.

**Design:** This is a retrospective cross-sectional analysis for 2018-19.

**Methods:** We conducted a retrospective cross-sectional analysis for India and its 30 states. Data was taken from Global Burden of Disease 2019, the National Health Profile 2020, and the National Health Accounts 2021. We used ten per-capita surgical costs to calculate enhanced coverage costs. Enhanced coverage costs for the total need were calculated by multiplying prevalence with per-capita costs. For unmet need, the difference between the prevalence and surgeries achieved was used. For economic benefits of averted cataract burden, we multiplied disability-adjusted life-years (DALYs) with non-health GDP per capita, i.e., GDP - the government health expenditure. DALYs for unmet needs were calculated by multiplying DALYs with the ratio of unmet to total needs. For net benefits, we subtracted the enhanced coverage costs for meeting total and unmet needs from economic benefits.

**Results:** The annual enhanced coverage costs for covering total cataract needs in India were 0.92 - 4.9 billion USD. Costs for covering unmet needs were 0.72 - 3.82 billion USD. Nationally, the economic benefit of averting the total cataract disease burden was 12.4 (95%UI: 8.9 - 16.7) billion USD, while the for covering the unmet burden was 9.7 (95%UI: 6.93 - 13) billion USD. Annual net benefits of covering total needs were 7.53 - 11.5 billion USD. Net benefits of covering unmet needs were 5.9 - 9 billion USD.

**Conclusion:** Enhancing coverage for cataract is cost-beneficial.

## Introduction

Cataract is the leading cause of curable blindness in India - the most populous country as of 2023.<sup>1,2</sup> With a growing elderly population, ailments like cataracts will be on the rise in India. Currently, India runs the National Programme for Control of Blindness and Vision Impairment (NPCBVI) which aims to control cataract blindness. NPCBVI achieves these aims by procuring essential drugs and surgical consumables and providing financial support to government hospitals, private practitioners, non-governmental organizations, and community health workers like Accredited Social Health Activists (ASHAs) via a reimbursement system.<sup>3</sup>

In 2018, India had a cataract prevalence of 30.34 million.<sup>4</sup> However, the National Health Profile (NHP) noted 6.66 million cataract surgeries (22% of the total prevalence).<sup>5</sup> NHP has utilized data from the National Program for Control of Blindness. 84 per 100,000 population hospitalizations for cataracts occurred in private settings instead of 41 per 100,000 in public settings.<sup>6</sup> The out-of-pocket expenditure (OOPE) for cataract treatment in private health centers was at least three times higher than in public health centers.<sup>6</sup> This indicates that surgeries are performed in hospitals not covered by the program, leading to an increased OOPE. Currently, overall healthcare OOPE contributes to 63% of healthcare expenditures.<sup>7</sup> Among other reasons, high OOPE is due to India's persistent low government health expenditure equaling only 3.16% of the gross domestic product (GDP).<sup>8</sup> Health insurance schemes like Pradhan Mantri Jan Arogya Yojana (PMJAY) Government Health Schemes, and private insurance packages help alleviate the high OOPE. Yet, 30% of the population is completely uninsured resulting in several households into impoverishment.<sup>7</sup>

Households can handle the high OOPE according to their income level. For instance, low-income households either choose to get no surgery or opt for subsidized procedures under government health insurance schemes. Whereas, middle and high-income households have an additional option to undergo the procedure nonsubsidized. The existing insurance schemes can cover 70% of the population.<sup>7</sup> However, the real population coverage is less due to the overlap of eligibility across PMJAY, Central Government Health Schemes, and private insurance packages.

There are two potential approaches to address the high unmet need for cataract surgeries. First, the government could play the role of the provider and expand resources to provide surgical care in a public setting. Second, the government can play the role of the buyer so families can seek care from public or private facilities. Regardless of which method is used to fulfill the unmet need for cataract, the government must increase financial funding. In this study, we estimated the costs of enhancing coverage for cataracts, the economic benefits of averting the cataract disease burden, and the net benefits of enhanced coverage.

## Methods

We conducted a retrospective cross-sectional analysis for 2018 for India and its 30 states. We excluded union territories - Andaman and Nicobar, Chandigarh, Dadra and Nagar Haveli, Daman, and Diu, Lakshadweep, and Puducherry because we did not have their health financing indicators - government health expenditure. For the state of Mizoram, instead of 10 surgical

costs, we have used 9 surgical costs excluding the National Sample Survey (NSS) mean cost per surgery.<sup>9</sup> According to the NSS, no cataract surgeries were recorded for Mizoram, hence no mean cost per surgery was recorded. However, this might be a sampling issue. Data sources for all variables are listed in **Supplementary Table 1**. The analysis can be split into three parts.

First, we calculated the costs for enhanced cost coverage under two scenarios - total needs and unmet needs. The total need was defined as cataract prevalence. The unmet need was defined as the number of people with cataracts who did not get operated on, i.e., the difference between prevalence and surgeries conducted under NPCBVI. Through a literature review, we extracted ten per capita surgical package costs from multiple sources like the NSS, PMJAY government insurance scheme, and the Aravind Eye Hospital-Madurai.<sup>10,11</sup> From NSS - the nationally representative household survey, we took the state-wise mean costs for seeking cataract surgery. From PMJAY, we took six different package costs for Phacoemulsification (PHACO) and Small Incision cataract surgeries (SICS). We looked at the Aravind Eye Care Model for its efficient system of providing high-quality cataract surgery at a low cost.<sup>11</sup> We considered three costs from the Aravind Eye Care Model: direct medical, patient-level indirect which included food, travel, and lost work during the perioperative period, and societal costs which were the sum of direct and indirect costs.<sup>11</sup>

Costs and their sources are detailed in **Supplementary Table 2**. To ensure uniformity, all costs were converted from INR to USD and adjusted for inflation for the year 2020.<sup>12,13</sup> To calculate the population-level enhanced coverage costs for covering total needs, we multiplied cataract prevalence by the per capita cataract surgical package costs (**Equation 1**). To calculate the enhanced coverage costs for covering the unmet needs, we multiplied the difference between prevalence and surgeries conducted with the per capita costs (**Equation 2**). Hence, we have twenty enhanced coverage costs for each Indian state and India. We conducted uncertainty propagation using the 95% uncertainty intervals associated with cataract prevalence. This accounted for potential variations in the prevalence data and made the analysis more robust and comprehensive. Mean cataract prevalence values and the 95% uncertainty intervals (upper and lower bound) were taken from GBD 2019.

$$\text{Costs for coverage expansion for total needs} = \text{Cataract prevalence} \times \text{surgical costs} \quad (\text{Eq.1})$$

$$\text{Costs for coverage expansion for unmet needs} = (\text{cataract prevalence} - \text{cataract surgeries}) \times \text{surgical costs} \quad (\text{Eq.2})$$

Second, the economic benefits of averted disease burden if cataract coverage is provided were calculated using the value-of-life-year (VLY) or the full-income approach.<sup>14,15</sup> The approach estimates the monetary value of each year of life, even beyond the years of active workforce contribution considering the gains in the GDP and the population-level life expectancy due to past investments in basic public health interventions.<sup>16</sup> The Lancet Commission on Investing in Health projected that for South Asia, the value of one life-year could be approximately 2.8 times the GDP per capita at a 3% discount rate.<sup>17</sup> As a simpler adaptation, we multiplied non-health GDP per capita by a factor of 2.8. This gave us the life-year cost (**Equation 3**). Data for health financing indicators was extracted from the National Health Account (NHA).<sup>18</sup> For India and states, we considered the national and state-level Gross Domestic Product (GDP) and Total

Health Expenditure (THE). To quantify the economic benefits (value of life year), we multiplied the life-year cost with averted disability-adjusted life-years (DALYs) associated with cataracts (**Equation 4**). We assumed that surgeries are efficacious in reducing all cataract disease burdens. Mean DALY values and the 95% uncertainty intervals were taken from GBD 2019, i.e. we accounted for the smallest (lower bound) and largest (upper bound) values for DALY. To account for DALYs averted by covering unmet needs, we multiplied the DALYs averted by meeting total needs by the ratio of unmet to total needs (**Equation 5**). To account for uncertainties in economic benefits, we propagated uncertainties from the DALY values. All calculations were conducted for two scenarios - total and unmet need.

$$\text{Life - year cost} = (\text{GDP per capita} - \text{THE per capita}) \times 2.8 \quad (\text{Eq.3})$$

$$\text{Value of life year} = (\text{GDP per capita} - \text{THE per capita}) \times \text{DALYs} \times 2.8 \quad (\text{Eq.4})$$

$$\text{DALY for unmet need} = \text{DALY} \times \frac{\text{unmet need}}{\text{total need}} \quad (\text{Eq.5})$$

Third, we calculated the net benefits from covering total needs by subtracting the costs for covering the total needs from the economic benefits of averted total cataract burden (**Equation 6**). Similarly, we calculated net benefits from costs covering the unmet needs (**Equation 7**). The error was propagated for the net benefits from covering total and unmet needs as follows. First, the lower bound value was subtracted from the mean value of the costs for enhanced cost coverage. This difference was called delta x (**Equation 8**). Similarly, the difference between the lower bound and mean value of economic benefits was called delta y (**Equation 9**). Error value for net benefits was calculated as the square root of the sum of squared delta x and squared delta y values. This was taken as delta z and the corresponding upper and lower bound values were calculated for net benefits (**Equation 10**).

$$\text{Mean net benefits for total need} = \text{Mean VLY} - \text{expansion coverage cost for total need} \quad (\text{Eq.6})$$

$$\text{Mean net benefits for unmet need} = \text{Mean VLY} - \text{expansion coverage costs for unmet need} \quad (\text{Eq.7})$$

$$\Delta x = \text{Mean value of expansion coverage cost} - \text{lower bound of expansion coverage cost} \quad (\text{Eq.8})$$

$$\Delta y = \text{Mean value of economic benefits of cataract coverage expansion} - \text{lower bound of economic benefits of cataract coverage expansion.} \quad (\text{Eq. 9})$$

$$\Delta z = \sqrt{\Delta x^2 + \Delta y^2} \quad (\text{Eq. 10})$$

We conducted a sensitivity analysis using the complication rates from the Aravind Eye Care Model.<sup>19</sup> Complication rates were used to adjust surgeries to give complication rate-adjusted unmet needs (**Equations 11-12**). Values are shown in **Supplementary Table 5**. In turn, this was used to calculate complication rate-adjusted enhanced coverage costs, economic benefits, and net benefits (**Supplementary Tables 6-8**).

$$\text{New number of surgeries achieved} = \text{Complication rate} \times \text{Number of surgeries achieved}$$
(Eq. 11)

$$\text{complication rate} - \text{adjusted unmet need} = \text{cataract prevalence} - \text{complication rate} - \text{adjusted surgeries}$$
(Eq. 12)

Data generated and used in this study are available in Harvard Dataverse <sup>20</sup>.

## Results

Annual costs for coverage expansion for covering total cataract needs in India were 0.92 - 4.9 billion USD (**Figure 1a**). While those for covering unmet needs were 0.72 - 3.82 billion USD (**Figure 1b**). We saw a 0.01% difference in coverage expansion costs nationally on adjusting for complication rates. Large and populous states like Maharashtra, Rajasthan, and Bihar had higher costs for coverage expansion. Small Northeastern states like Sikkim and Arunachal Pradesh had lower costs for coverage expansion (**Supplementary Tables 3 and 4**). Using the complication rate-adjusted surgeries, Uttar Pradesh had the highest expansion coverage cost of 610.4 (95%UI: 523.7 - 715.8) million USD using per capita costs from NSS. In contrast, using patient-indirect costs from the Aravind Eye Care Model, Sikkim had the lowest cost at 0.4 (95%UI: 0.3 - 0.4) million USD. The economic benefit of averting the total cataract burden for India was 12.4 (95%UI: 8.9 - 16.7) billion USD (**Figure 2a**), while that of averting unmet cataract burden was 9.7 (95%UI: 6.93 - 13) billion USD (**Figure 2b**). The economic benefits for averting the total and unmet burden were highest for Maharashtra and lowest for Sikkim (**Figures 2a & b**). The annual net benefits from covering total needs in India ranged from 7.53 (95%CI: 6.95 to 8.10) billion USD to 11.5 (95%CI: 11.4 to 11.6) billion USD while those from covering unmet needs ranged from 5.9 (95% CI: 3.11 to 8.7) billion USD to 9 (95%CI: 6.2 to 11.8) billion USD (**Figure 3**). Twenty-seven (90%) states depicted net benefits for both total and unmet need scenarios. State-wise net benefits/losses are presented in **Supplementary Figures 1-30**. The highest and lowest net benefits were seen in Maharashtra (**Supplementary Figure 24**) and Meghalaya (**Supplementary Figure 16**), respectively. Bihar (**Supplementary Figure 9**), Meghalaya (**Supplementary Figure 16**), and Manipur (**Supplementary Figure 13**) had net losses for only certain per capita surgical package costs. For instance, Bihar depicted net losses for covering total needs for only two of the ten cost packages considered (**Supplementary Figure 9**).

## Discussion

Increasing cost coverage is beneficial for the government. Costs for expansion of cataract coverage were calculated to cover total and unmet needs showing wide interstate variability due to differences in population size, disease burden, and GDP values. Expectedly, states like Maharashtra, Uttar Pradesh, and Rajasthan have greater costs for coverage expansion than those for northeastern states like Sikkim and Nagaland. After adjusting for complication rates, Uttar Pradesh had the highest expansion coverage cost with a 21.2% increase. Maharashtra and Bihar followed closely behind. Sikkim had the lowest expansion coverage costs after adjusting for complications, with a 100% increase after adjustment. This is followed by Arunachal Pradesh and Mizoram.

The complication rate-adjusted surgeries lead to a difference in cataract coverage expansion costs. For both, unadjusted and complication rate-adjusted expansion coverage costs, patient (indirect) costs using mean intraocular lens (IOL) cost from Aravind Eye Care Model, led to lowest expansion coverage costs.<sup>11</sup> Whereas, mean costs from NSS led to the highest expansion coverage costs.<sup>9</sup> However, in most scenarios, 27 states in India would have net benefits from the enhanced cost coverage of cataract surgeries. Hence, Investing in universal cataract coverage caters to the rising burden.

The economic burden of cataracts as a preventable cause of blindness and the cost-effectiveness of covering case detection strategies have been studied in India.<sup>10,21,22</sup> The present analysis estimates the state-wise economic benefits of expanding cost coverage of cataract surgeries in India, which was previously missing. The net benefits are substantial, which should be an impetus for policymakers to expand and provide universal cataract coverage.

According to the NPCBVI (2015-2019) Summary Report, the private sector conducted 57.85% of cataract surgeries whereas the public sector conducted 39.3% of surgeries.<sup>2</sup> Further, OOPE was the major barrier for patients seeking surgery. This conundrum can be resolved by either the government directly providing the service or paying other service providers to offer the service at a lower cost. Hence, expanding NPCBVI by increasing direct payments to service providers in the government setup can improve access to government setups and ease the financial burden of the care seekers.<sup>2</sup> Moreover, investments can be utilized to expand services in the government and private sectors to achieve universal coverage.<sup>23</sup>

For the bottom 40% of the population, cataract surgeries are insured under PMJAY. An increase in investment in PMJAY will increase coverage of surgeries for the uninsured population due to a decrease in OOPE leading to universal cataract coverage. Investing in cataract insurance can bring new providers to places lacking access as previously observed in Rashtriya Sam Bima Yojana (RSBY).<sup>24,25</sup> RSBY allocated funds to states like Jharkhand and Chhattisgarh which resulted in an uptick in private practitioners setting up clinics in these states. Consequently, when PMJAY was initiated, 99% of the total cataract claims were raised from private hospitals in Chhattisgarh and Jharkhand. Contrarily, states such as Madhya Pradesh where government hospitals provide care, had low utilization of PMJAY cataract packages. Low utilization of PMJAY packages in government hospitals can be a result of coverage provided by NPCBVI. Expectedly, demand for PMJAY cataract packages increased significantly even among smaller clinics improving access to beneficiaries.<sup>10</sup> Hence, the enhanced investments can provide cataract coverage by public sector expansion or government-funded health insurance.

To our knowledge, this is the first state-wise pan-India analysis of the costs and benefits of universal cataract coverage. We provide a library of over 900 estimates under multiple scenarios and cost assumptions. We also ensured robustness through uncertainty propagation. However, the study has the following limitations. First, we assumed that surgeries could treat the entire disease burden which may not be true. Second, we only analyzed the annual net benefits of 2018 and did not project future benefits. Nonetheless, the over-time benefits for future years would only rise further. Hence, our findings could be considered as the lower bound of the net benefits.

## References

1. Vashist P, Senjam SS, Gupta V, et al. Blindness and visual impairment and their causes in India: Results of a nationally representative survey. *PLoS ONE*. 2022;17(7):e0271736. doi:10.1371/journal.pone.0271736
2. National Programme for Control of Blindness & Visual Impairment, Directorate General of Health Services, Ministry of Health & Family Welfare, Government of India, New Delhi. National Blindness and Visual Impairment Survey India 2015-2019 - A Summary Report. NPCBVI - MoHFW. Accessed July 25, 2023. <https://npcbvi.mohfw.gov.in/writeReadData/mainlinkFile/File341.pdf>
3. D.R. Meena. Pattern of Assistance under the National Programme for Control of Blindness and Visual Impairment (NPCBVI) during 2017-20. April 23, 2018.
4. Preedy VR, Watson RR, eds. GBD. In: *Handbook of Disease Burdens and Quality of Life Measures*. Springer New York; 2010:4213-4213. doi:10.1007/978-0-387-78665-0\_5696
5. Central Bureau of Health Intelligence, Directorate General of Health Services, Ministry of Health and Family Welfare. National Health Profile 2020, 15th Issue. 2020.
6. Kastor A, Mohanty SK. Disease-specific out-of-pocket and catastrophic health expenditure on hospitalization in India: Do Indian households face distress health financing? *PLoS ONE*. 2018;13(5):e0196106. doi:10.1371/journal.pone.0196106
7. Sarwal R, Kumar A. Health insurance for india's missing middle. October 27, 2021. doi:10.31219/osf.io/s2x8r
8. National Health Systems Resource Centre (2022). National Health Accounts Estimates for India. Published online 2022. Accessed June 21, 2024. [https://nhsrindia.org/sites/default/files/2022-09/NHA%202018-19\\_07-09-2022\\_revised\\_0.pdf](https://nhsrindia.org/sites/default/files/2022-09/NHA%202018-19_07-09-2022_revised_0.pdf)
9. National Sample Survey Office, NSSO - Ministry of Statistics & Programme Implementation, Government of India. India - Household Social Consumption: Health, NSS 75th Round Schedule-25.0 :July 2017-June 2018. May 9, 2022. Accessed August 13, 2023. <http://microdata.gov.in/nada43/index.php/catalog/152>
10. Naib, P, Nigam DR, Gautam K, Goel H. *Cataract Management under Ayushman Bharat Pradhan Mantri Jan Arogya Yojana (PM-JAY)*. National Health Authority; 2021:9.
11. Le H-G, Ehrlich JR, Venkatesh R, et al. A Sustainable Model For Delivering High-Quality, Efficient Cataract Surgery In Southern India. *Health Aff (Millwood)*. 2016;35(10):1783-1790. doi:10.1377/hlthaff.2016.0562
12. Webster I. \$3,000,000 in 2005 → 2020 | Inflation Calculator. August 13, 2023. Accessed July 27, 2023. <https://www.officialdata.org/us/inflation/2005?endYear=2020&amount=3000000>
13. Internal Revenue Service. Yearly Average Currency Exchange Rates. IRS. February 16,



2023. Accessed July 27, 2023.  
<https://www.irs.gov/individuals/international-taxpayers/yearly-average-currency-exchange-rates>
14. Dalal K, Svanström L. Economic burden of disability adjusted life years (dalys) of injuries. *Health*. 2015;07(04):487-494. doi:10.4236/health.2015.74058
  15. Muthuri RNDK, Kirigia JM. The Monetary Value of Disability-Adjusted Life Years in Kenya in 2017. *Sage Open*. 2020;10(4):215824402097055. doi:10.1177/2158244020970556
  16. Jamison DT, Summers LH, Alleyne G, et al. Global health 2035: a world converging within a generation. *Lancet*. 2013;382(9908):1898-1955. doi:10.1016/S0140-6736(13)62105-4
  17. Chang AY, Robinson LA, Hammitt JK, Resch SC. Economics in “Global Health 2035”: a sensitivity analysis of the value of a life year estimates. *J Glob Health*. 2017;7(1):010401. doi:10.7189/jogh.07.010401
  18. National Health Systems Resource Centre (2021). National Health Accounts Estimates for India (2017-18). 2021. Accessed August 13, 2023. <https://nhsrindia.org/sites/default/files/2021-11/National%20Health%20Accounts-%202017-18.pdf>
  19. Haripriya A, Chang DF, Reena M, Shekhar M. Complication rates of phacoemulsification and manual small-incision cataract surgery at Aravind Eye Hospital. *J Cataract Refract Surg*. 2012;38(8):1360-1369. doi:10.1016/j.jcrs.2012.04.025
  20. Arora A, Vuddemarry M, Reddy C, Iyer H, Nimkar P, Zadey S. Data for Cost-Benefit Analysis for Universal Cataract Coverage in India for 2018 - Harvard Dataverse. June 30, 2024. Accessed July 1, 2024. <https://doi.org/10.7910/DVN/DTEZXS>
  21. Mannava S, Borah RR, Shamanna BR. Current estimates of the economic burden of blindness and visual impairment in India: A cost of illness study. *Indian J Ophthalmol*. 2022;70(6):2141-2145. doi:10.4103/ijo.IJO\_2804\_21
  22. Narib P, Nigam DrR. Cataract Management under Ayushman Bharat Pradhan Mantri Yojana (PMJAY) - Working Paper 003.
  23. Wong B ,b ,c ,d ,e ,f &, Singh K, Everett B, et al. The case for investment in eye health: systematic review and economic modelling analysis. *Bulletin of Worl*. Published online 2023. Accessed June 13, 2024. <https://www.ncbi.nlm.nih.gov/pmc/articles/PMC10680113/pdf/BLT.23.289863.pdf>
  24. Programme Evaluation Organisation Planning Commission Government of India. Evaluation Study on Rashtriya Sam Vikas Yojna (RSVY). Published online 2009. Accessed June 21, 2024.

[https://www.dmeo.gov.in/sites/default/files/2019-10/Evaluation%20Study%20on%20Rashtriya%20Sam%20Vikas%20Yojna%20%28RSVY%29\\_0.pdf](https://www.dmeo.gov.in/sites/default/files/2019-10/Evaluation%20Study%20on%20Rashtriya%20Sam%20Vikas%20Yojna%20%28RSVY%29_0.pdf)

25. Government of India. Rashtriya Swasthya Bima Yojana: Health Insurance for the Poor. 2008. Accessed June 30, 2024.  
<https://www.india.gov.in/spotlight/rashtriya-swasthya-bima-yojana>

## Acknowledgements

The authors would like to thank Ram Pachpor and Tejali Gangane for their assistance with data and Dr. Sweta Dubey for their helpful comments.

## Declarations

**Ethics approval and consent to participate:** Not applicable

**Consent for publication:** Not applicable

**Funding:** None

## Authors' contributions:

**Study concept and design:** Siddhesh Zadey

**Acquisition, analysis, or interpretation of data:** Anoushka Arora, Pushkar Nimkar, Himanshu Iyer, Siddhesh Zadey

**Drafting of the manuscript:** Anoushka Arora, Madhurima Vuddemarry, Chaitanya Reddy

**Critical revision of the manuscript for important intellectual content:** All authors

**Statistical analysis:** Anoushka Arora, Pushkar Nimkar

**Administrative, technical, or material support:** Siddhesh Zadey

**Study supervision:** Siddhesh Zadey

**Dataset Availability:** Data used and generated in this manuscript can be found in the associated repository at Harvard Dataverse (<https://doi.org/10.7910/DVN/DTEZXS>)

## Figure Captions

**Figure 1: Range of enhanced cataract coverage costs across surgical package costs for meeting a. Total needs and b. Unmet needs.** All costs are adjusted to millions of USD for the year 2020. Abbreviations: NSS - National Sample Survey, PMJAY - Pradhan Mantri Jan Arogya Yojana, PHACO - Phacoemulsification, IOL - Intraocular lens, SICS - Small Incision Cataract Surgery.

**Figure 2a: Economic benefits measured using the value of life-year (VLY) approach from averting cataract disease burden under a. Total needs and b. Unmet needs scenarios.** Values in million USD.

**Figure 3: Net Benefits for meeting Total and unmet Needs for universal cataract coverage in India.** All costs are adjusted to USD for the year 2020. Positive values depict net benefit while negative values depict net loss. Abbreviations: NSS - National Sample Survey, PMJAY - Pradhan Mantri Jan Arogya Yojana, PHACO - Phacoemulsification, IOL - Intraocular lens, SICS - Small Incision Cataract Surgery

**a.****States**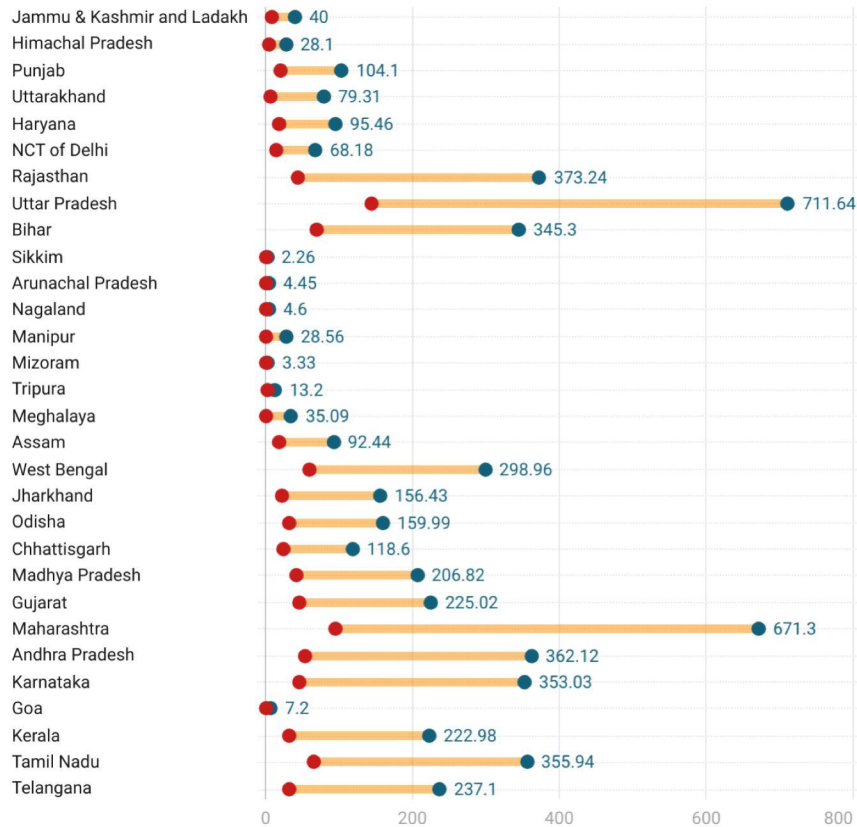**Cost in millions (USD)****b.****States**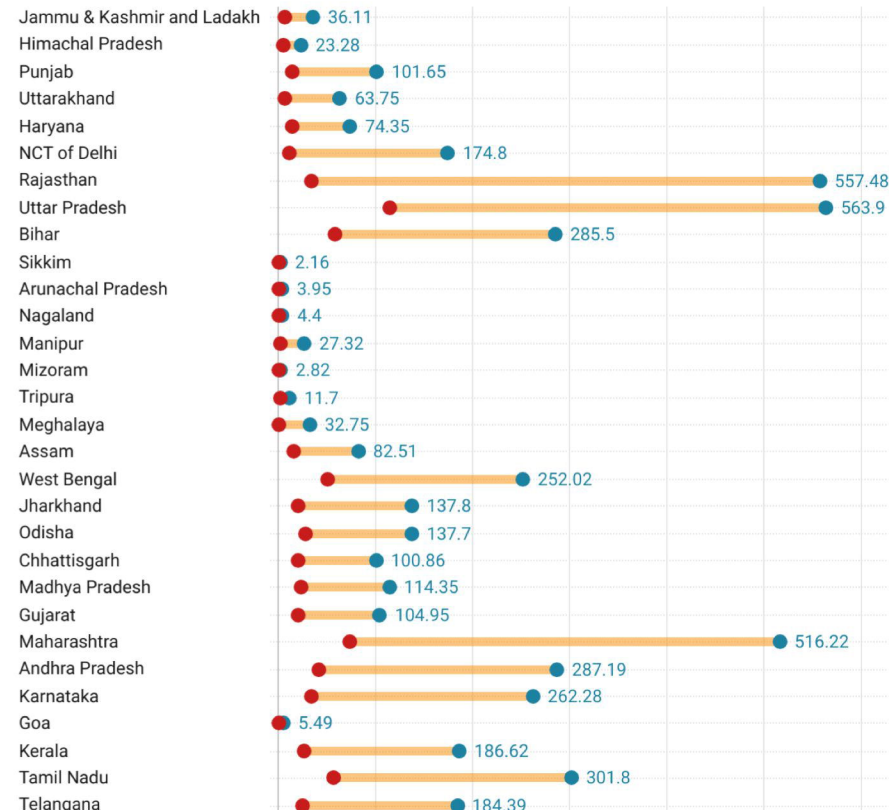**Cost in millions (USD)**

**a.**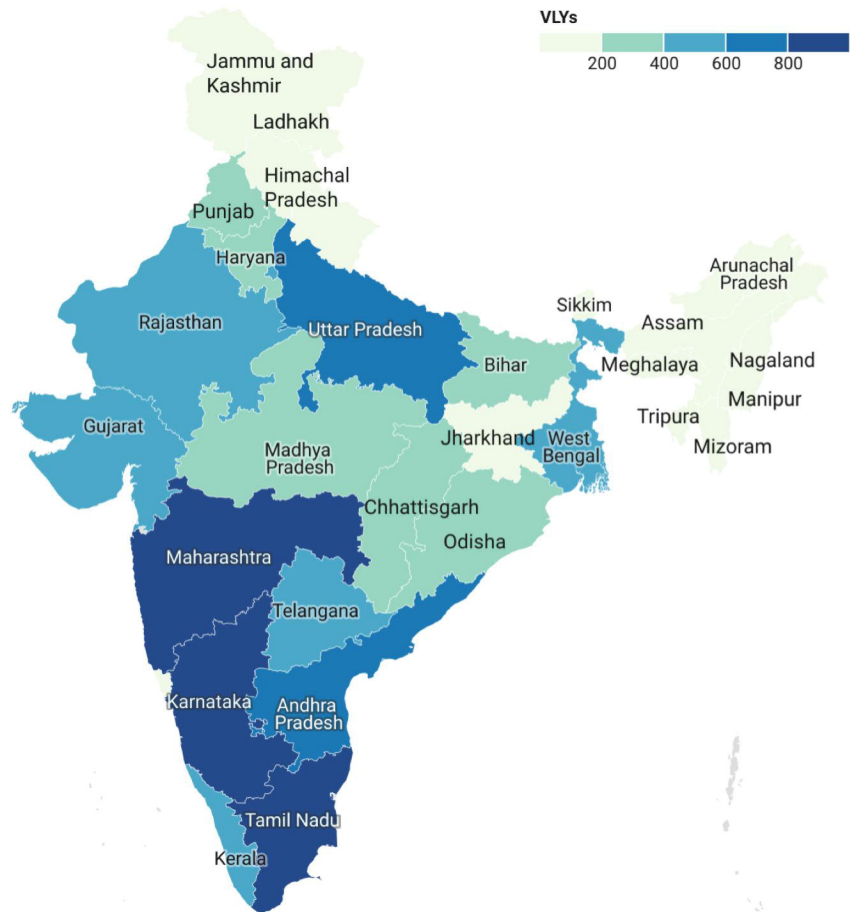**b.**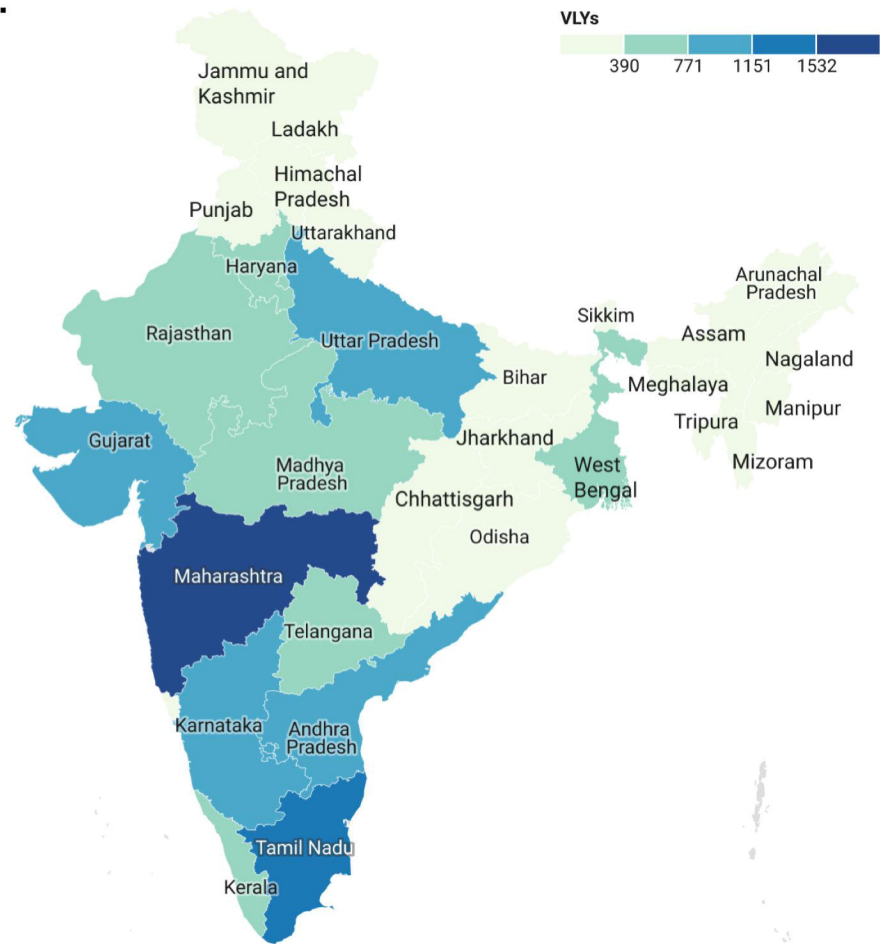

Total Needs Unmet Needs

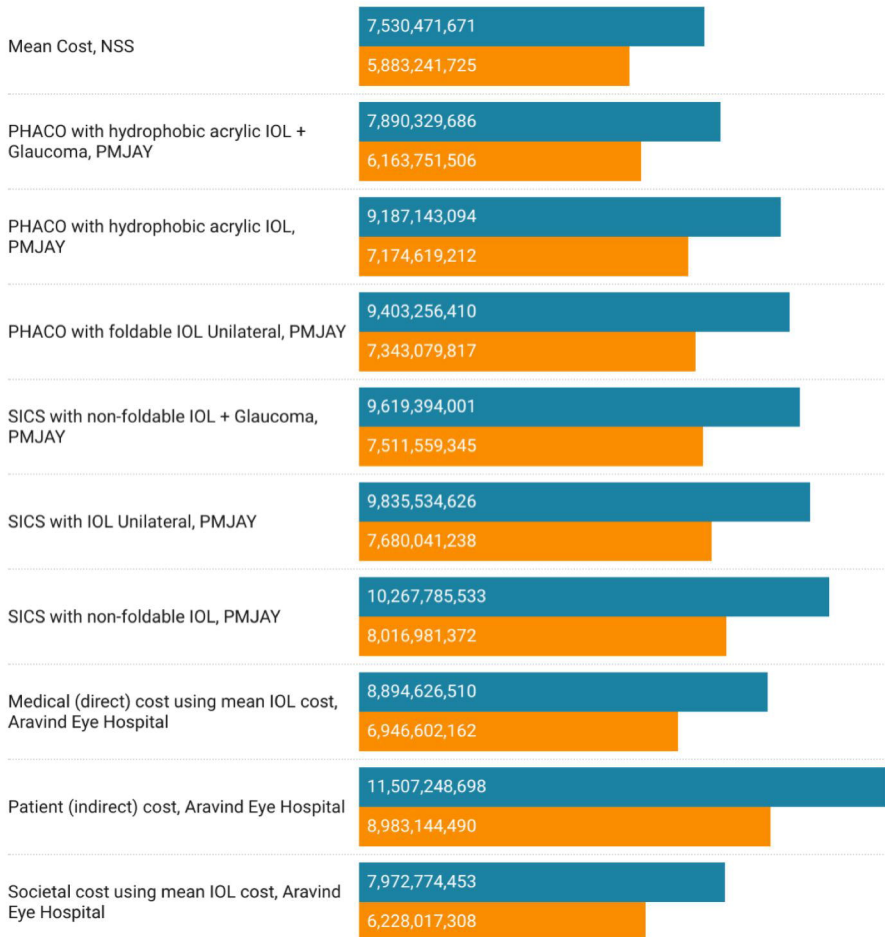

Net benefits (USD)
